# Supplementary figures and images for: Application of Machine Learning Models Based on H&amp;E Staining for Mitochondrial-Related Genes Classification and Prognosis of Lung Adenocarcinoma
Source: Research Square preprint supplement (doi:10.21203/rs.3.rs-7252366/v1), 2025-11-26

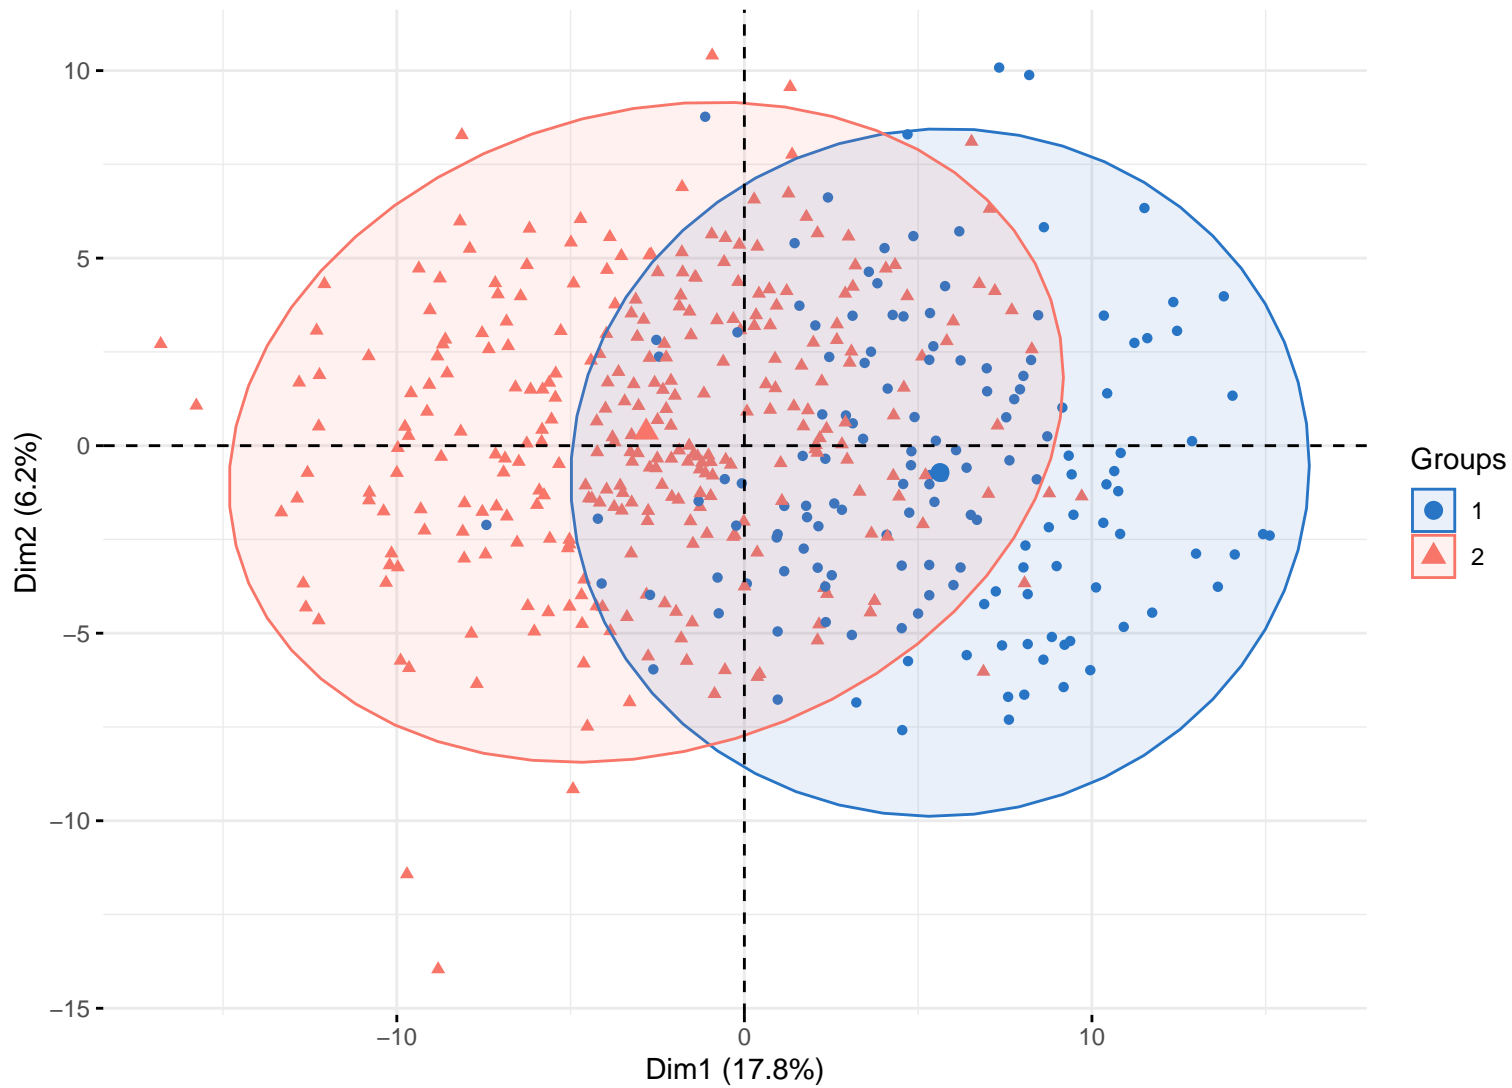

Supplement: Supplementary file 1 [file pca(NMF).pdf › supplementary imformation/NMFmodel for MRGs/pca(NMF).pdf]
